# Supplementary material for: Functional cardiac orexin receptors: role of orexin-B/orexin 2 receptor in myocardial protection
Source: PubMed Central journal article supplement — Clin Sci (Lond). 2018 Dec 13;132(24):2547–64. doi: 10.1042/CS20180150 (PMC6365625; doi:10.1042/cs20180150), 2018-12-13

**Supplementary Figure 1: Experimental protocol for the isolated Langendorff perfused rat heart and the *in vivo* model of ischaemia reperfusion (n=8).**

**Protocol (1):** presents the control pre-treatment study, which consisted of 30 minutes (min) stabilisation followed by 30 min global ischaemia and 120 min reperfusion. For the treatment groups, hearts were perfused with Tyrode's+treatment agent for 10 min prior to 30 min global ischaemia followed by 120 min reperfusion.

**Protocol (2):** presents the post-treatment study group, hearts were perfused with Tyrode's+treatment for 30 min into the start of reperfusion after which the hearts were perfused with Tyrode's only.

**Protocol (3):** presents the *in vivo* rat model of regional ischaemia and reperfusion; the pre-treatment was with a bolus intravenous (i.v.) injection (e.g. of orexin B 10 nmol) 10 min prior to 30 min regional ischaemia and 120 min reperfusion.

**Supplementary Figure 2:** A: Rat testes (positive control), B and C: Different sections of rat heart stained positive for OR-A, D: Rat Heart; a region that is not positive for OR-A; demonstrating antibody specificity. Magnification x40

**Supplementary Figure 1**

**Protocol 1**

(pre-treatment protocol *in situ*)

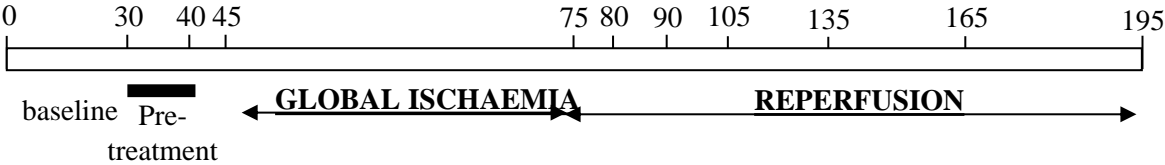

**Protocol 2**

(post-treatment protocol *in situ*)

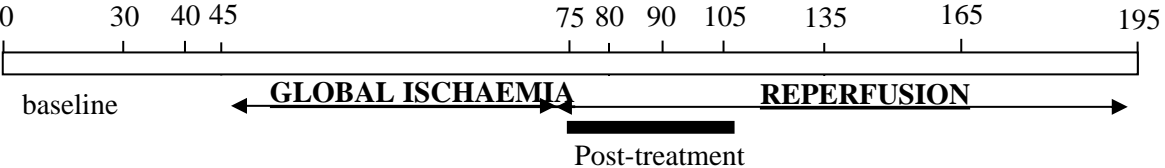

**Protocol 3**

(pre-treatment *in vivo*)

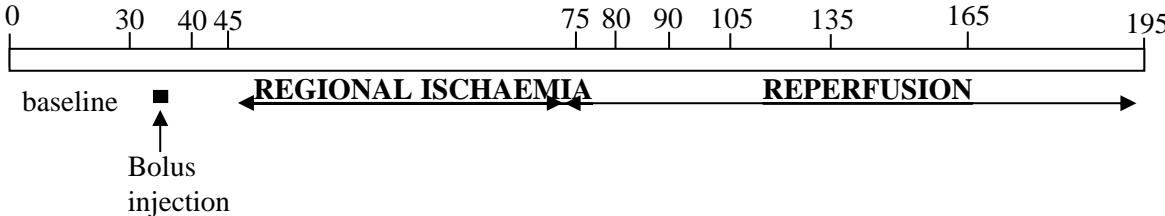

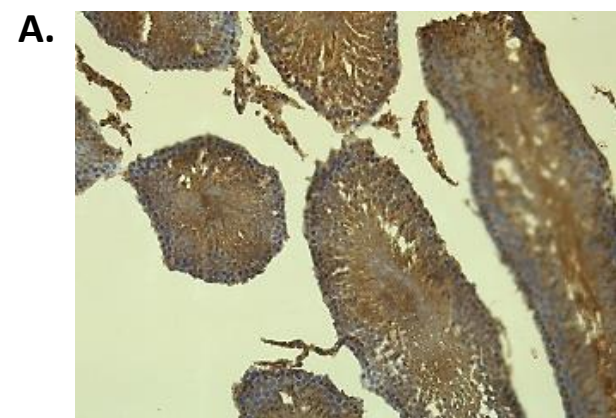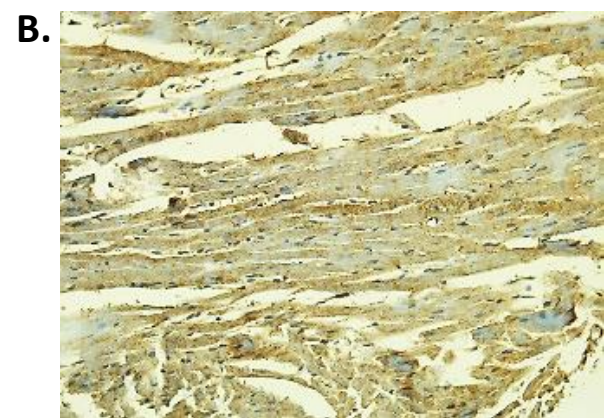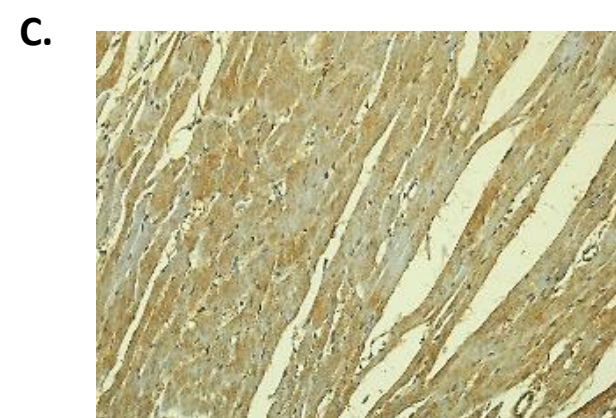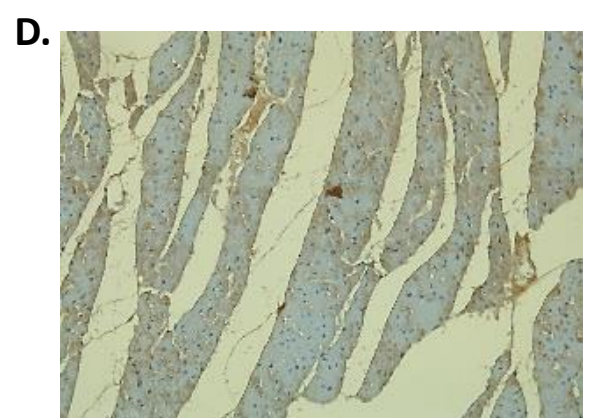

Supplement: cs-132-cs20180150_supp1.pdf [file cs-132-cs20180150_supp1.pdf]
